# Supplementary material for: Highly efficient orange luminescence in Sn2+-doped Cs2AgInCl6 double perovskite with a large Stokes shift
Source: Royal Society of Chemistry journal article supplement (doi:10.1039/d4tc04823g), 2025-01-01
Supplement: d4tc04823g1.pdf [file d4tc04823g1.pdf]

## Supporting Information

### Highly Efficient Orange Luminescence in Sn<sup>2+</sup>-doped Cs<sub>2</sub>AgInCl<sub>6</sub>

#### Double Perovskite with Large Stokes Shift

Jingrui Guo,<sup>Ⓐ</sup> Jing Guo,<sup>\*Ⓐ</sup> Yuchen Peng,<sup>Ⓐ</sup> Jiajia Wang,<sup>Ⓐ</sup> Weidan Ma,<sup>Ⓐ</sup> Na Zhang,<sup>Ⓐ</sup>

Yan Zhang,<sup>Ⓐ</sup> Yufeng Liu,<sup>\*Ⓐ</sup> Yongzheng Fang<sup>\*Ⓐ</sup>

---

<sup>a</sup> School of Materials Science and Engineering, Shanghai Institute of Technology, Shanghai 201418, People's Republic of China.

<sup>b</sup> Shanghai Engineering Research Center of Photodetection Materials and Devices, Shanghai Institute of Technology, Shanghai 201800, People's Republic of China.

\*E-mail: guoj@sit.edu.cn, yfliu@mail.sitp.ac.cn, fyz1003@sina.com

<sup>Ⓒ</sup> These authors contributed equally to this work and should be considered co-first authors.

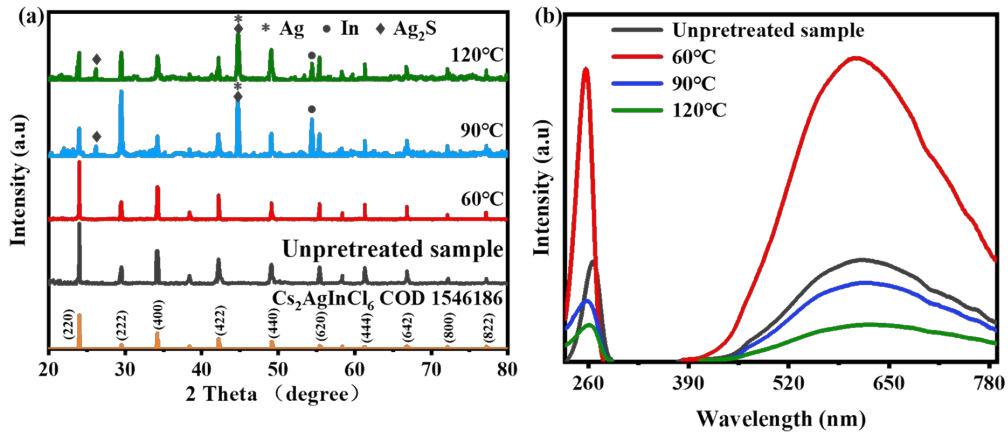

**Figure S1.** (a) XRD pattern of  $\text{Cs}_2\text{AgInCl}_6$  prepared under different temperatures. (b) PL and PLE spectra of  $\text{Cs}_2\text{AgInCl}_6$  corresponding to (a).

Peaks belongs to  $\text{Ag}_2\text{S}$  appears while treated temperature is 90 °C and 120 °C. As for how  $\text{Ag}_2\text{S}$  is produced, we infer that the reaction process maybe like this:

Firstly, DMSO could decompose under acid condition over 80 °C

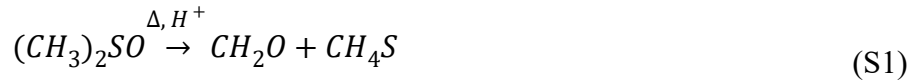

The  $\text{CH}_4\text{S}$  produced by decomposition can react with DMSO continually:

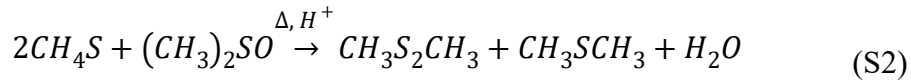

The  $\text{CH}_3\text{SCH}_3$  in this process will react with  $\text{H}_2\text{O}$  and obtain  $\text{H}_2\text{S}$ :

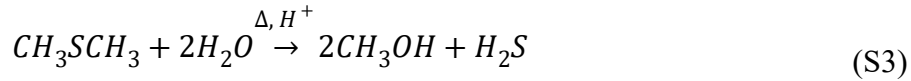

Due to the solubility of  $\text{Ag}_2\text{S}$  is less than that of  $\text{AgCl}$  and finally produced  $\text{Ag}_2\text{S}$  in the samples prepared at 90 °C and 120 °C.

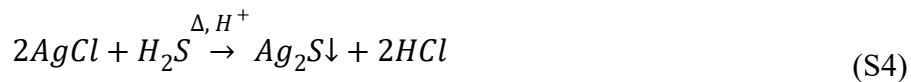

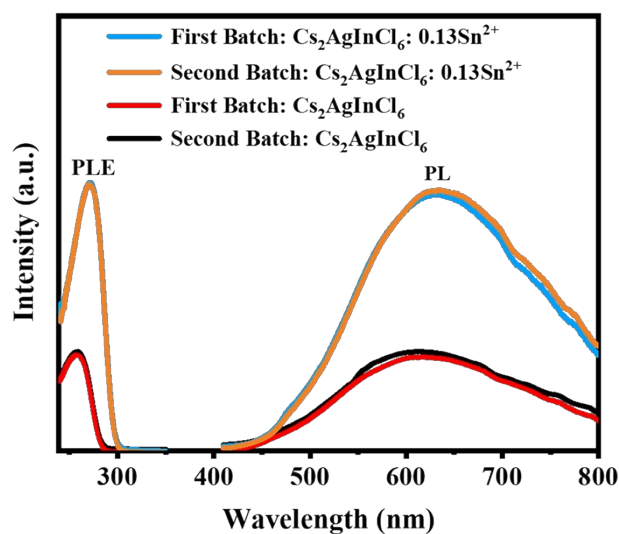

**Figure S2.** Spectral comparison of  $\text{Cs}_2\text{AgInCl}_6$  and  $\text{Cs}_2\text{AgInCl}_6: 0.13\text{Sn}^{2+}$  prepared in two different batches.

Reproducibility is very important for sample preparation. Take  $\text{Cs}_2\text{AgInCl}_6$  and  $\text{Cs}_2\text{AgInCl}_6: 0.13\text{Sn}^{2+}$  prepared in two batches as an example, the PLE and PL spectra of them in figure S2 shows the same shape, the excitation and emission wavelength of  $\text{Cs}_2\text{AgInCl}_6$  are 257 nm and 612 nm while  $\text{Cs}_2\text{AgInCl}_6: 0.13\text{Sn}^{2+}$  are 257nm and 619 nm, respectively. Importantly, the intensity of peaks in different batches is closely, indicating the well reproducibility of synthesis method. The important point needs to be emphasized in  $\text{Cs}_2\text{AgInCl}_6: x\text{Sn}^{2+}$  fabrication is the dissolution process. The solution must be transparent and clear when transferred to the autoclave, after chemicals added into DMSO and HCl under vigorously stirring at room temperature (25 °C) for 2 h.

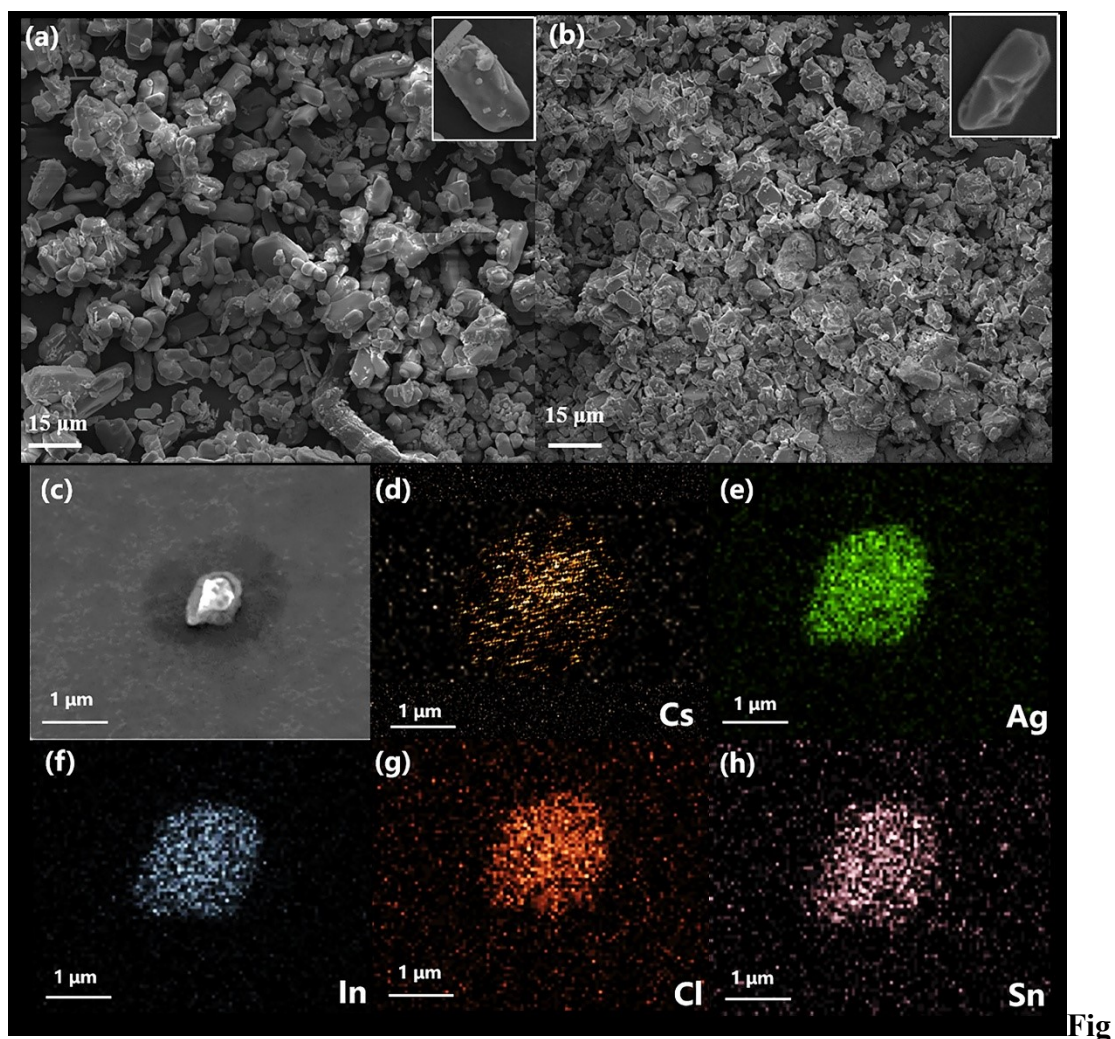

**Figure S3.** SEM images of Cs<sub>2</sub>AgInCl<sub>6</sub>: *x*Sn<sup>2+</sup>, (a) *x*=0, (b) *x*=0.13. (c) Cs<sub>2</sub>AgInCl<sub>6</sub>: 0.13Sn<sup>2+</sup> particle in (b). (d)-(h) are elemental mapping of (c).

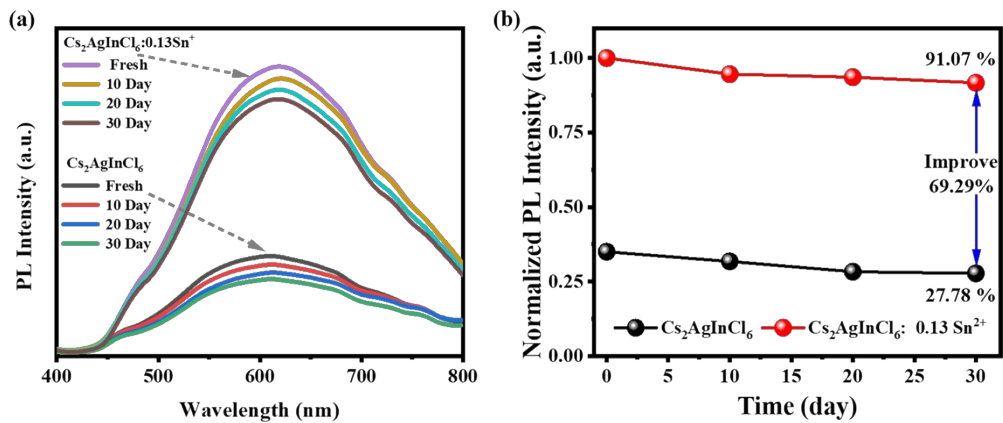

**Figure S4.** (a) PL spectra of  $\text{Cs}_2\text{AgInCl}_6$  and  $\text{Cs}_2\text{AgInCl}_6:0.13\text{Sn}^{2+}$  after stored for different time. (b) PL peak change corresponding to (a).

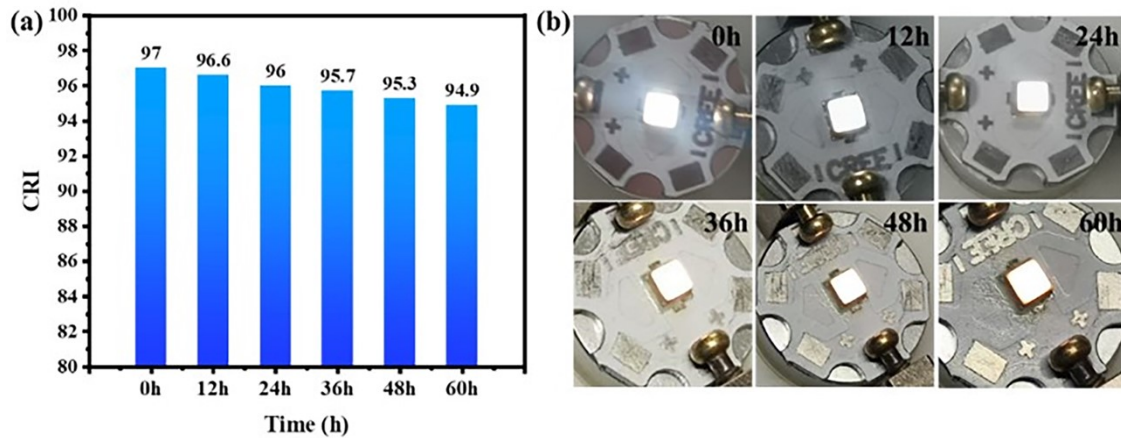

**Figure S5.** (a) The CRI of WLED after exposed to air for 60 h in 12 h increments. (b) Pictures of package WLED corresponding to (a).

The CRI of the packaged WLED was tested in 12 h increments while the device is directly exposed to the air, as shown in figure S5. 60 h later, the CRI of the WLED is 94.9, which is 97.8% remained compared to the initial value, also is much higher than all of the samples in table S4.

**Table S1.** The position of PL and PLE peaks of Cs<sub>2</sub>AgInCl<sub>6</sub> under different hydrothermal treatment temperatures.

| <b>Preparation conditions of samples</b> | <b>PLE peak /nm</b> | <b>PL peak /nm</b> | <b>Stokes shift /nm</b> |
|------------------------------------------|---------------------|--------------------|-------------------------|
| <b>Unpretreated</b>                      | 266                 | 617                | 351                     |
| <b>60 °C</b>                             | 257                 | 611                | 354                     |
| <b>90 °C</b>                             | 259                 | 616                | 357                     |
| <b>120 °C</b>                            | 261                 | 624                | 363                     |

**Table S2.** ICP-OES results of  $\text{Cs}_2\text{AgInCl}_6: x\text{Sn}^{2+}$  ( $x$  represents the mass concentration ratios between  $\text{Sn}^{2+}$  and  $\text{In}^{3+}$ ).

| Sample                                        | ICP-OES  |          |      |
|-----------------------------------------------|----------|----------|------|
|                                               | In(mg/L) | Sn(mg/L) | $x$  |
| $\text{Cs}_2\text{AgInCl}_6: x\text{Sn}^{2+}$ | 465.98   | 61.02    | 0.13 |
|                                               | 424.48   | 108.60   | 0.26 |
|                                               | 310.53   | 115.88   | 0.37 |



**Table S3.** Photoluminescence spectroscopic analysis for  $\text{Cs}_2\text{AgInCl}_6: x\text{Sn}^{2+}$ .

| Samples                                          | PLE peak /nm | PL peak /nm | Stokes shift /nm |
|--------------------------------------------------|--------------|-------------|------------------|
| $\text{Cs}_2\text{AgInCl}_6$                     | 257          | 612         | 355              |
| $\text{Cs}_2\text{AgInCl}_6: 0.13\text{Sn}^{2+}$ | 257          | 619         | 362              |
| $\text{Cs}_2\text{AgInCl}_6: 0.26\text{Sn}^{2+}$ | 257          | 618         | 361              |
| $\text{Cs}_2\text{AgInCl}_6: 0.37\text{Sn}^{2+}$ | 257          | 617         | 360              |

**Table S4.** Comparison between different ions doped Cs<sub>2</sub>AgInCl<sub>6</sub> and this work.

|                              | Materials                                                                                               | Stokes shift /nm | PLQY /%   | CIE                  | CCT /K      | Ra        | Ref      |
|------------------------------|---------------------------------------------------------------------------------------------------------|------------------|-----------|----------------------|-------------|-----------|----------|
| <b>Single element doping</b> | Cs <sub>2</sub> AgInCl <sub>6</sub> :30%Bi <sup>3+</sup>                                                | -                | 4         | (0.36,0.35)          | 4443        | 91        | S1       |
|                              | Cs <sub>2</sub> AgInCl <sub>6</sub> : Bi                                                                | 212              | 11.4      | -                    | -           | -         | S2       |
|                              | Cs <sub>2</sub> AgInCl <sub>6</sub> : 1.5%Mn                                                            | 330              | 16        | -                    | -           | -         | S3       |
|                              | Cs <sub>2</sub> AgIn <sub>0.833</sub> Bi <sub>0.176</sub> Cl <sub>6</sub>                               | 260              | 39        | -                    | 3119        | 85        | S4       |
| <b>Co-doping</b>             | Cs <sub>2</sub> (Ag/Na)InCl <sub>6</sub> : 1.0%Cu <sup>+</sup>                                          | 240              | 62.6      | (0.374,0.380)        | 4060        | 86        | S5       |
|                              | Cs <sub>2</sub> AgInCl <sub>6</sub> : Bi-Sm                                                             | -                | 13.04     | (0.535,0.440)        | 2000        | 82        | S6       |
|                              | Cs <sub>2</sub> Ag <sub>0.7</sub> Na <sub>0.3</sub> InCl <sub>6</sub> : Bi                              | -                | 87.2      | (0.38,0.44)          | 4347        | 87.8      | S7       |
|                              | Cs <sub>2</sub> Ag <sub>0.7</sub> Na <sub>0.3</sub> In <sub>0.9</sub> Bi <sub>0.1</sub> Cl <sub>6</sub> | 245              | 32.7      | (0.44,0.41)          | 2953        | 88.7      | S8       |
| <b>This Work</b>             | <b>Cs<sub>2</sub>AgInCl<sub>6</sub>: 0.13Sn<sup>2+</sup></b>                                            | <b>363</b>       | <b>29</b> | <b>(0.370,0.367)</b> | <b>4210</b> | <b>97</b> | <b>-</b> |

Table S4 summarized the properties of some other doping works on single element doping and two elements co-doping in Cs<sub>2</sub>AgInCl<sub>6</sub>, including material properties (PLQY and Stokes shift) and WLED properties (CIE, CCT, Ra). The Stokes shift and PLQY of Cs<sub>2</sub>AgInCl<sub>6</sub>: 0.13Sn<sup>2+</sup> is much larger than most of the other samples. The specifications of the WLED device are more optimal than all the other works. It can be found that the overall performance, no matter material and the WLED device, Cs<sub>2</sub>AgInCl<sub>6</sub>: 0.13Sn<sup>2+</sup> is relatively excellent than many other works. These results positioned the findings within the broader field and highlight the specific advantages of Sn<sup>2+</sup> doping.

## Reference

- S1. D. Manna, T. K. Das and A. Yella, *Chem. Mater.*, 2019, **31**, 10063.
- S2. Y. Liu, Y. Jing, J. Zhao, Q. Liu and Z. Xia, *Chem. Mater.*, 2019, **31**, 3333.
- S3. F. Locardi, M. Cirignano, D. Baranov, Z. Dang, M. Prato, F. Drago, M. Ferretti, V. Pinchetti, M. Fanciulli, S. Brovelli, L. De Trizio and L. Manna, *J. Am. Chem. Soc.*, 2018, **140**, 12989.
- S4. M. B. Gray, J. D. Majher, T. A. Strom and P. M. Woodward, *Inorg. Chem.*, 2019, **58**, 13403.
- S5. X. Cheng, Z. Xie, W. Zheng, R. Li, Z. Deng, D. Tu, X. Shang, J. Xu, Z. Gong, X. Li and X. Chen, *Adv. Sci.*, 2022, **9**, 2103724.
- S6. Z. Rao, Z. Li, X. Zhao and X. Gong, *New J. Chem.*, 2022, **46**, 15192.
- S7. S. Li, Z. Shi, F. Zhang, L. Wang, Z. Ma, D. Wu, D. Yang, X. Chen, Y. Tian, Y. Zhang, C. Shan and X. Li, *ACS Appl. Mater. Interfaces*, 2020, **12**, 46330.
- S8. J. Xu, G. Chen, T. Yang, H. Wu, L. Li, C. Ma, C. Zhu, Y. Wu, B. Liu, A. Hu, X. Qiu, L. Zhong, J. Shen, A. Huang, Y. Guo and H. Gao, *J. Lumin.*, 2023, **255**, 119606.
